# Supplementary material for: An NMR Study on Hydration and Molecular Interaction of Phytantriol-Based Liquid Crystals
Source: MDPI journal article supplement (doi:10.3390/pharmaceutics14112312), 2022-10-27
Supplement: s1 [file s1]

## Supplementary file

**Table S1.** The proportion of NMR samples prepared with different hydration level

| Sample name | wt % H <sub>2</sub> O | m (phytantriol) mg | V (H <sub>2</sub> O) $\mu$ L |
|-------------|-----------------------|--------------------|------------------------------|
| PT12        | 12                    | 150.5              | 21                           |
| PT22        | 22                    | 135.6              | 35                           |
| PT28        | 28                    | 127.1              | 47                           |
| PT80        | 80                    | 38.5               | 156                          |

**Table S2.** The NMR experiments and adjusted parameters.

| No. | Spectra name        | Acquisition parameters                                              | Processing parameters                                                                                    |
|-----|---------------------|---------------------------------------------------------------------|----------------------------------------------------------------------------------------------------------|
| 10  | PROTON              | Standard 1D proton                                                  | Auto baseline correction method: Polynomial Fit; Auto phase correction; Reference: 7.26 ppm              |
| 11  | qNMR                | Quantitative 1D proton                                              | Same as 10                                                                                               |
| 12  | WATERSUP_zgesgppe   | 1D proton with suppression of H <sub>2</sub> O signal               | Same as 10                                                                                               |
| 13  | C13CPD              | Standard 1D 13C                                                     | Baseline correction method: Whittaker Smoother; Auto phase correction; Reference: 77.16 ppm              |
| 14  | HSQCEDETGPSISP      | Edited HSQC. 1sw=165, o2p=50                                        | Apodization: Sine square 90; Baseline correction method: Bernstein Polynomial Fit; Auto phase correction |
| 15  | PROF_HMBC_WATERSUPP | HMBC with solvent suppression. 1sw=165, o2p=50, ns=4, d1=2, 1td=256 | Same as 14                                                                                               |
| 16  | NOESYPHPR           | NOESY with solvent suppression.                                     | Same as 14                                                                                               |
| 17  | COSYGPSW            | Standard cosy                                                       | Apodization: Sine square 0                                                                               |
| 18  | DOSY_DC             | DOSY                                                                |                                                                                                          |

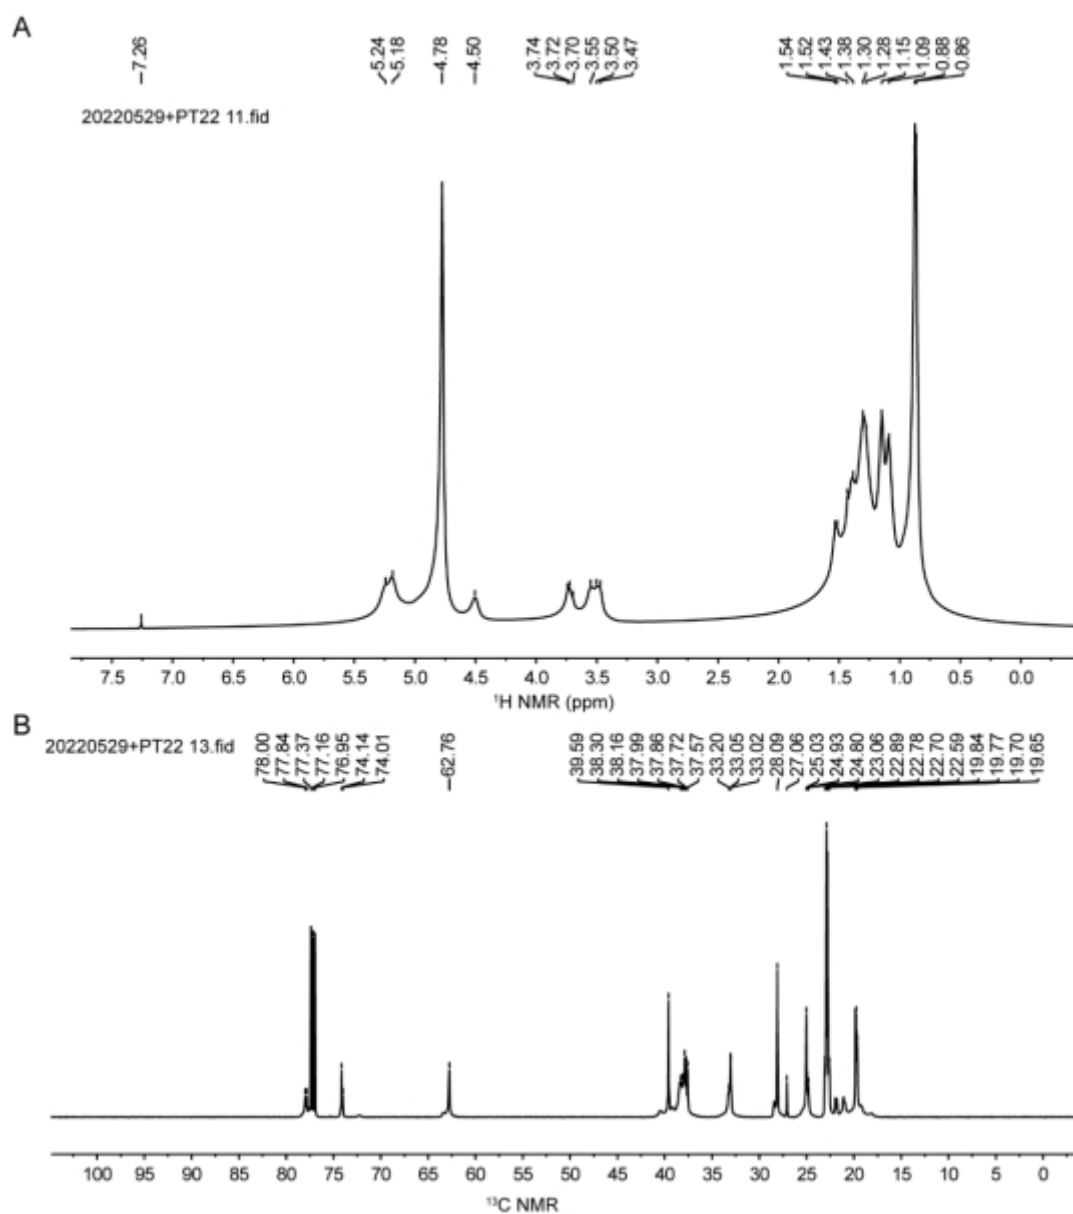

**Figure S1.** (A)  $^1\text{H}$  NMR and (B)  $^{13}\text{C}$  NMR spectra of PT22 (22% wt  $\text{H}_2\text{O}$ ) at day 63.

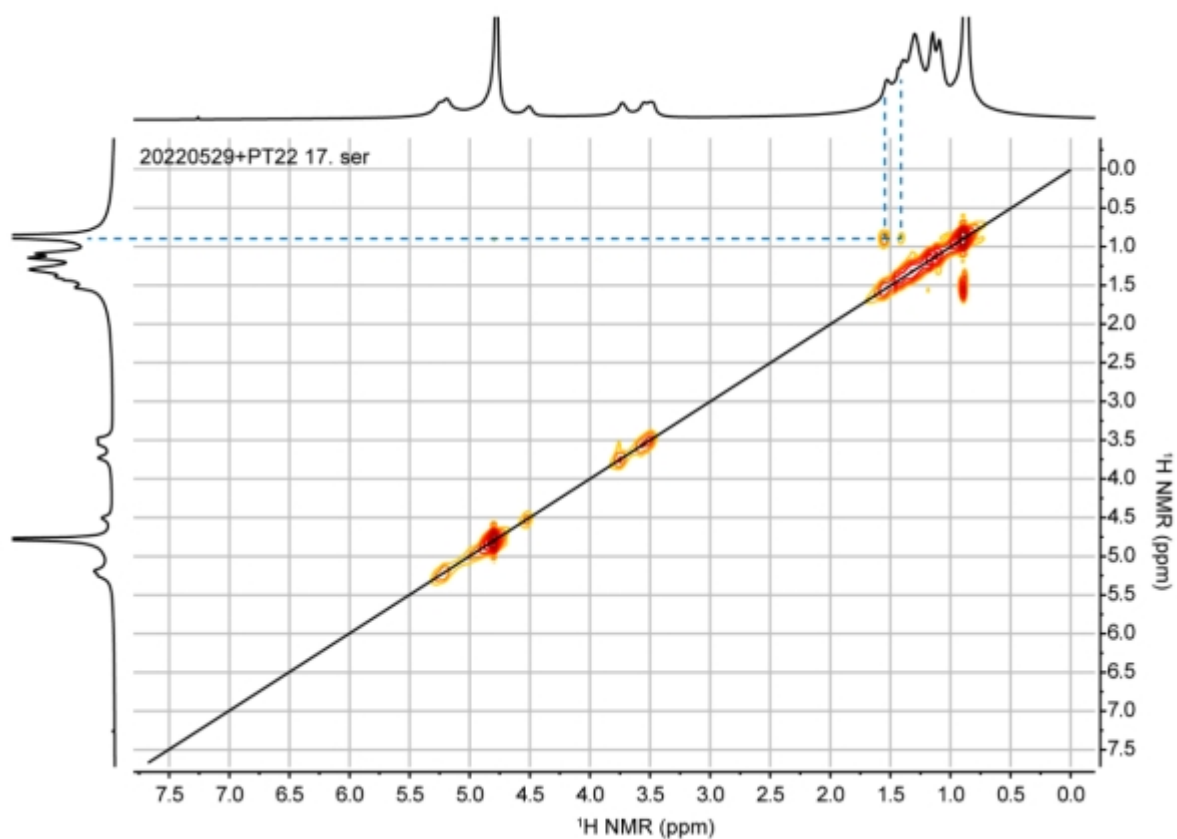

**Figure S2.**  $^1\text{H}$  –  $^1\text{H}$  COSY spectrum of PT22 (22% wt  $\text{H}_2\text{O}$ ) at day 63.

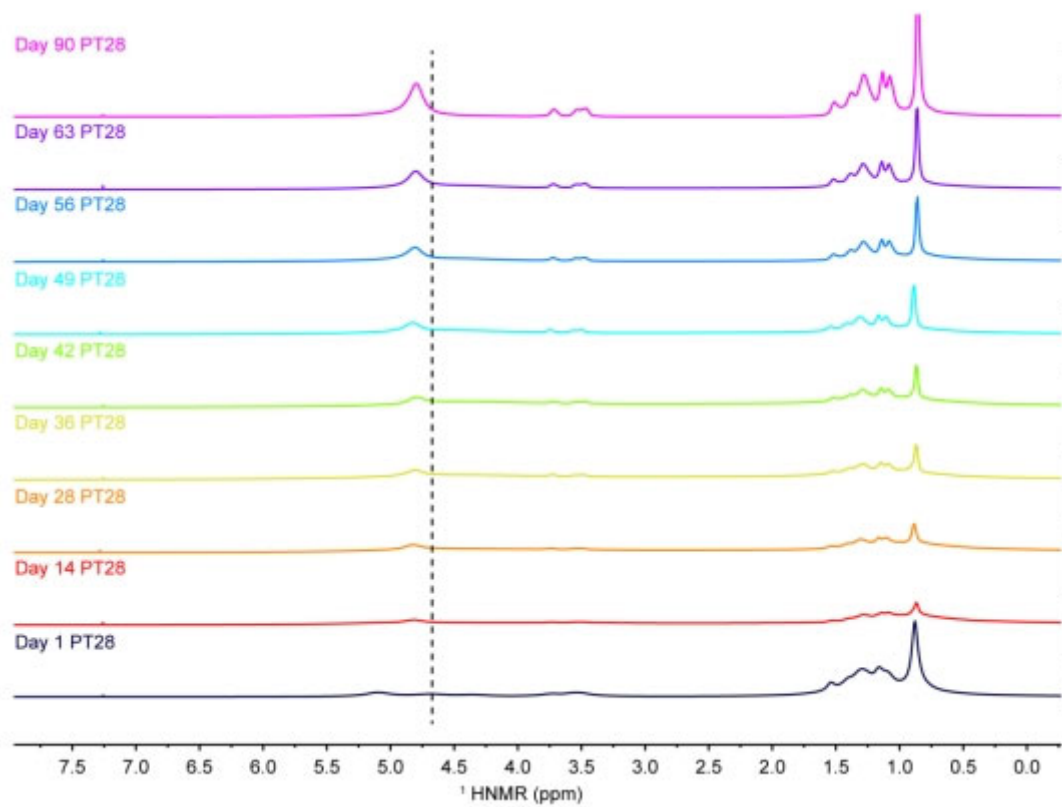

**Figure S3.**  $^1\text{H}$  NMR spectra of PT28 changed with time.

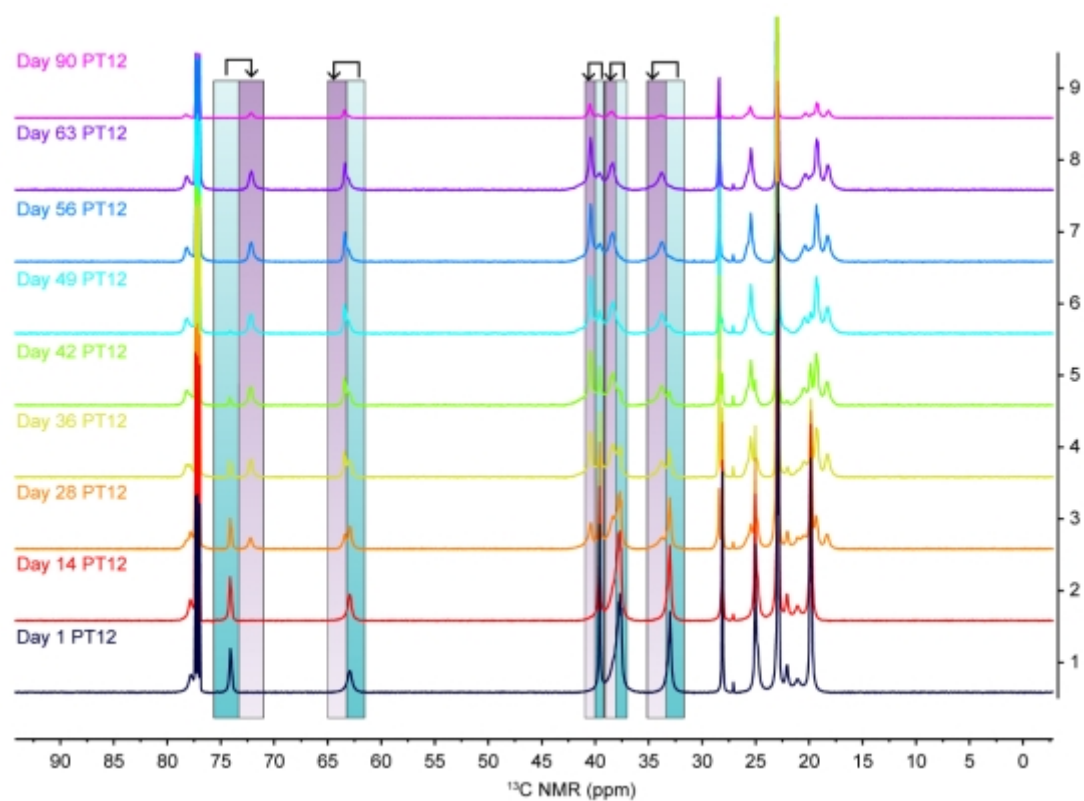

**Figure S4.**  $^{13}\text{C}$  NMR spectra of PT12 changed with time.

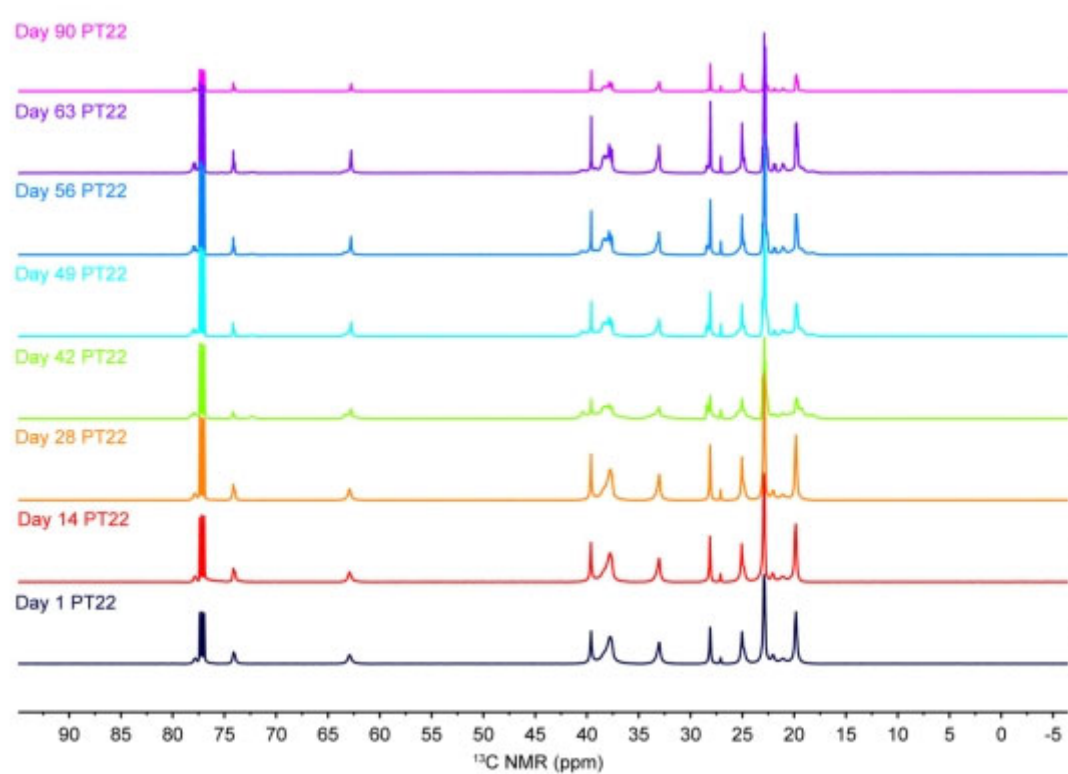

**Figure S5.**  $^{13}\text{C}$  NMR spectra of PT22 changed with time.

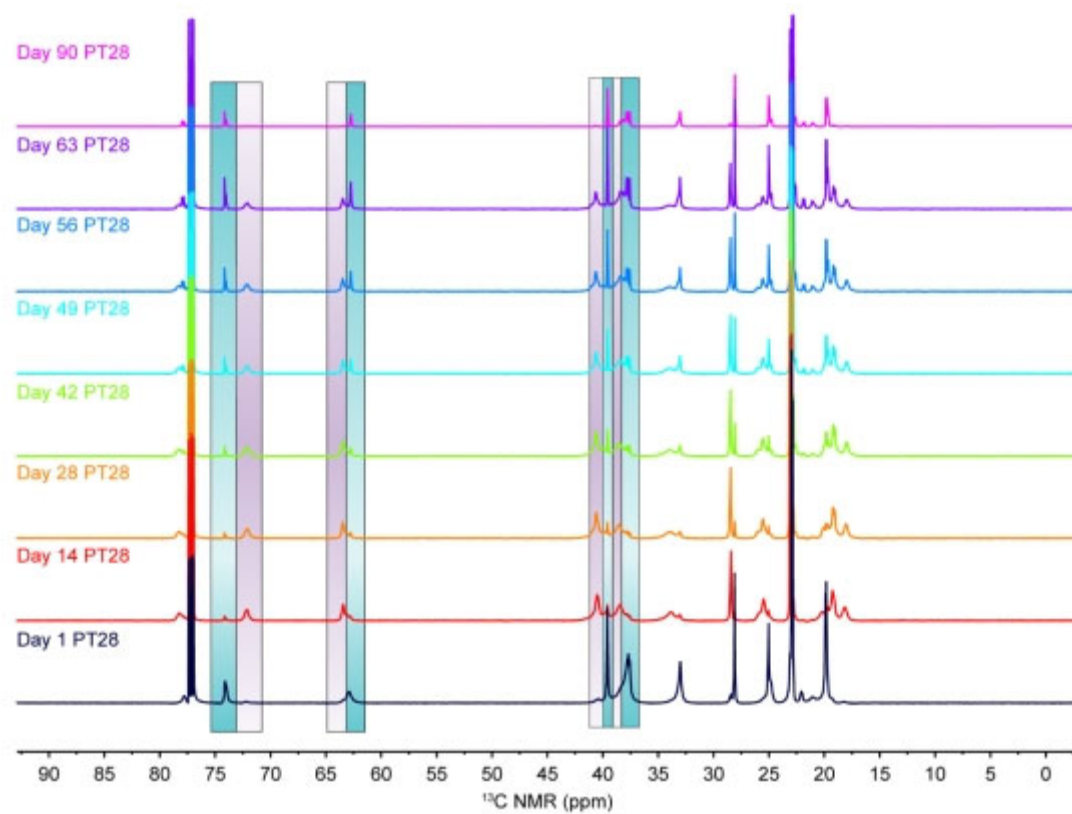

**Figure S6.**  $^{13}\text{C}$  NMR spectra of PT28 changed with time.

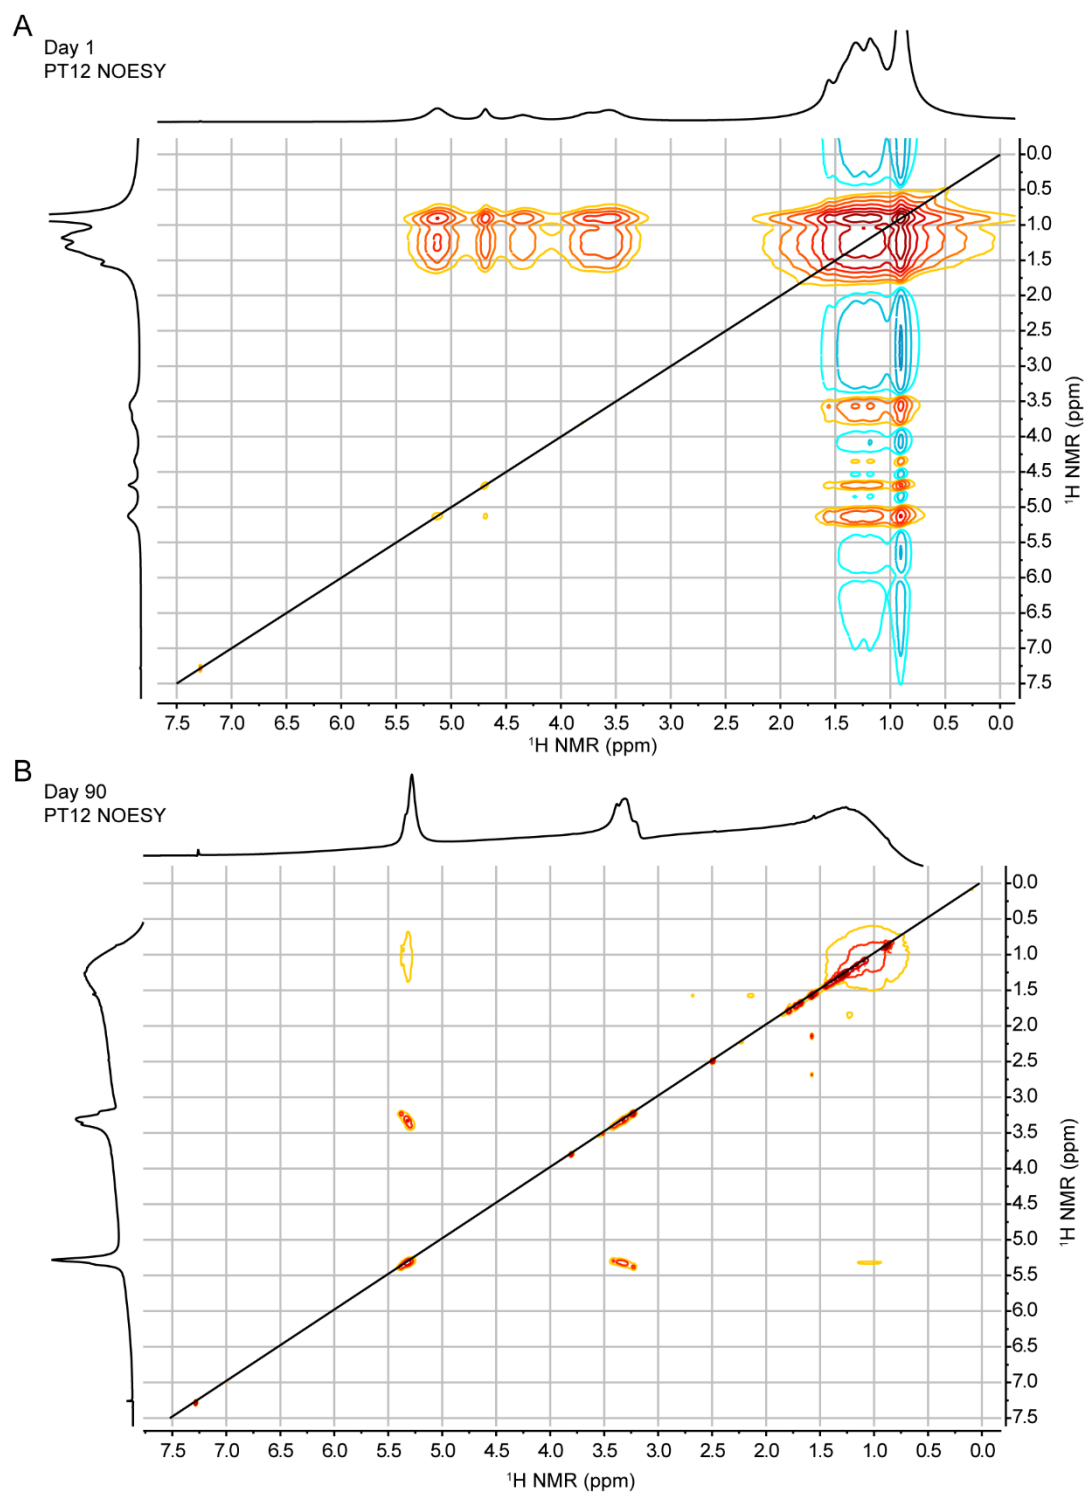

**Figure S7.**  $^1\text{H}$ - $^1\text{H}$  2D-NOESY spectra of PT12 on the (A) day 1 and (B) day 90.
